# Supplementary material for: Multi-gene signature of microcalcification and risk prediction among Taiwanese breast cancer
Source: PubMed Central journal article supplement (PMC7588423; doi:10.1038/s41598-020-74982-1), 2020-10-26
Supplement: 41598_2020_74982_MOESM1_ESM.pdf [file 41598_2020_74982_MOESM1_ESM.pdf]

Multi-gene Signature of Microcalcification and Risk Prediction among Taiwanese Breast Cancer

Hsin-Tien Tsai, Ching-Shui Huang, Chao-Chiang Tu, Chih-Yi Liu, Chi-Jung Huang, Yuan-Soon Ho, Shih-Hsin Tu, Ling-Ming Tseng, Chi-Cheng Huang

## Supplementary information

### Supplementary Figure legends

**Supplementary Fig 1** Relapse-free survival of Taiwanese breast cancers stratified by PAM50 molecular subtypes. Only subjects with long-term follow up were surveyed. SSP2: single sample predictor without normal breast-like subtype; Basal: basal-like; HER2: HER2-enriched; Lum-A: luminal A; Lum-B: luminal B molecular subtype; X-axis: survival time in year.

**Supplementary Fig 2** Volcano plot of Taiwanese breast cancer transcriptome. Blue dots indicated genes with differential mRNA abundance pertaining pathological microcalcification (p-value <0.001).

**Supplementary Fig 3** Volcano plot of Taiwanese breast cancer transcriptome. Blue dots indicated genes with differential mRNA abundance pertaining coexistent DCIS (p-value <0.001).

**Supplementary Fig 4** Cross-validated Receiver Operating Characteristic (ROC) curve of Bayesian compound covariate predictor (BCCP) classifier for multi-gene signature pertaining microcalcification.

**Supplementary Fig 5** Boxplots of microcalcification-relevant genes in independent dataset (GSE2109). Each plot includes mRNA abundance for one gene stratified by the class variable in X-axis (0: without microcalcification and 1: with microcalcification). The Y-axis represents log intensity and the title shows gene symbol. All comparisons were insignificant with p-values >0.001 (Wilcoxon rank sum test).

**Gene symbol list (from top to bottom) for Y-axis of Fig 3**

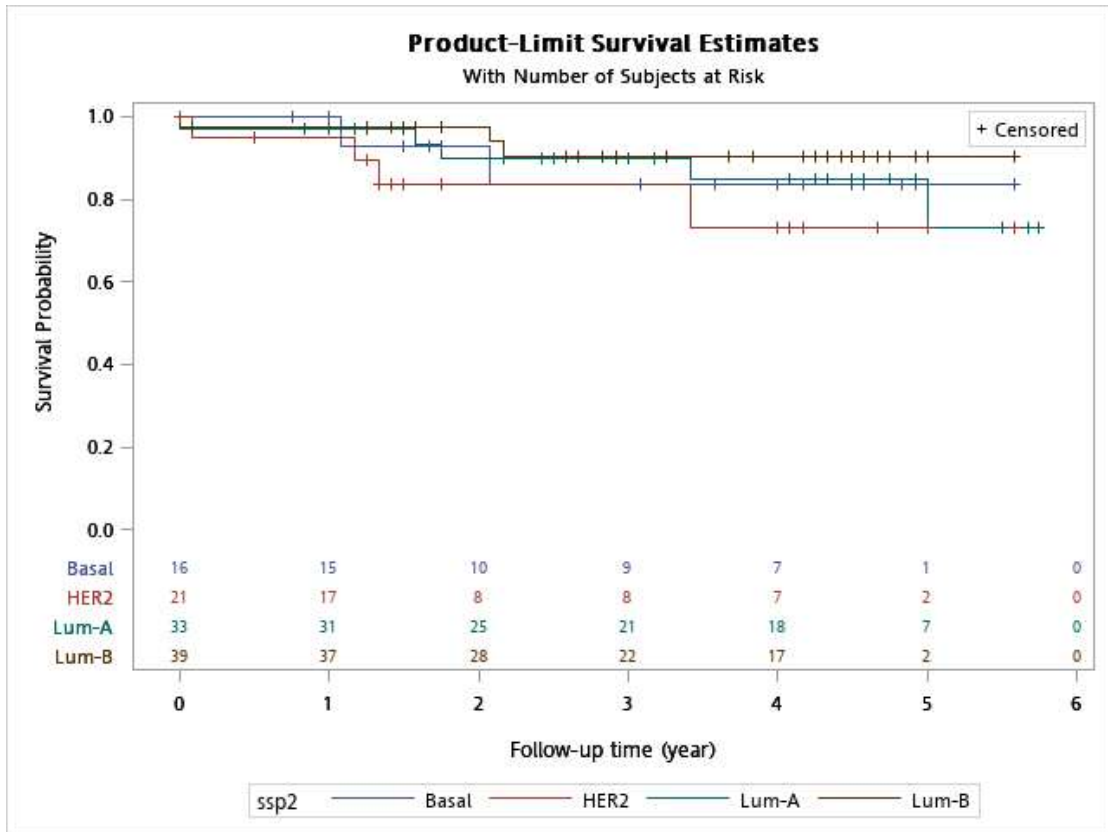

Supplementary Fig 1

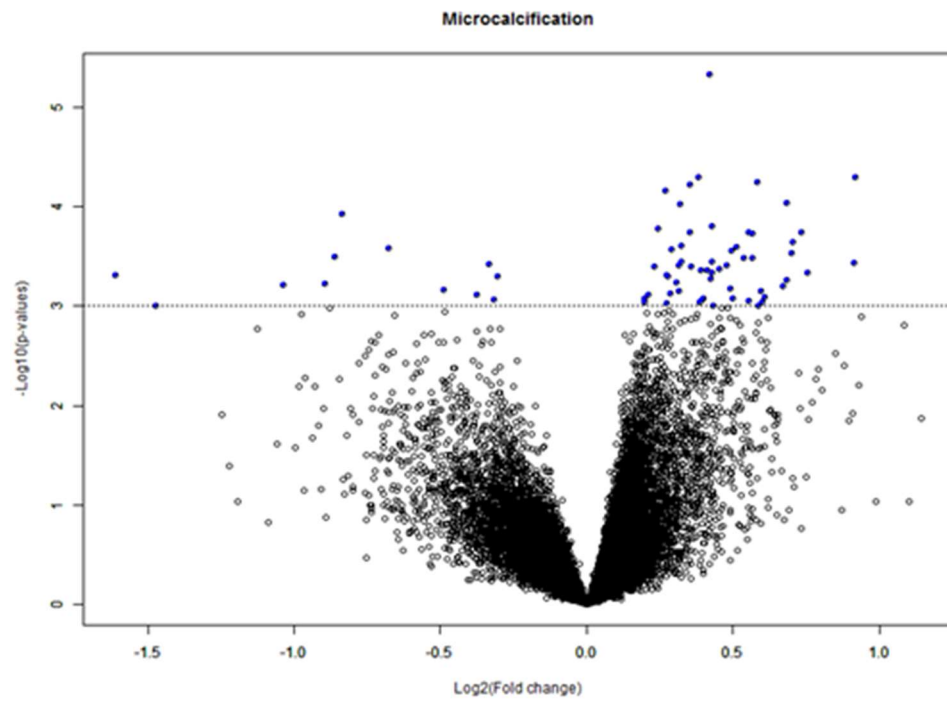

Supplementary Fig 2

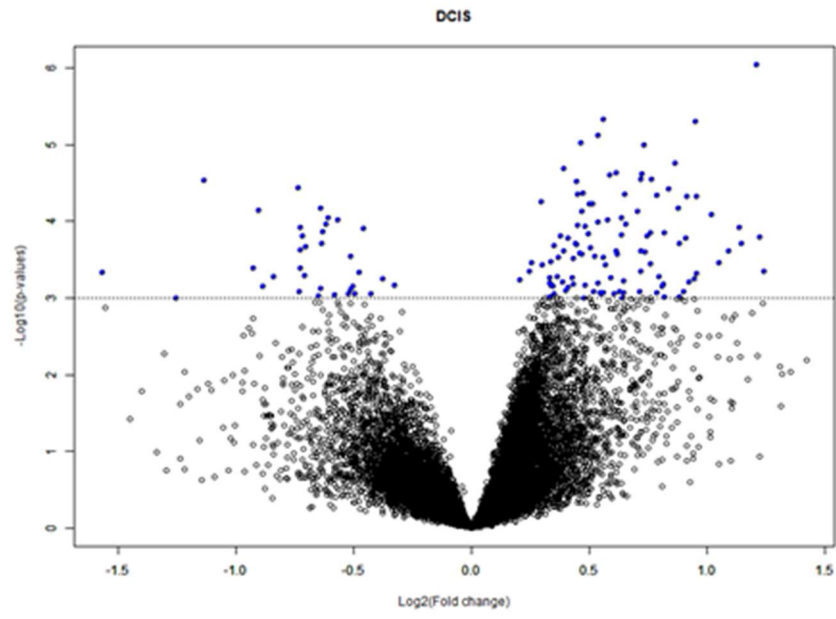

Supplementary Fig 3

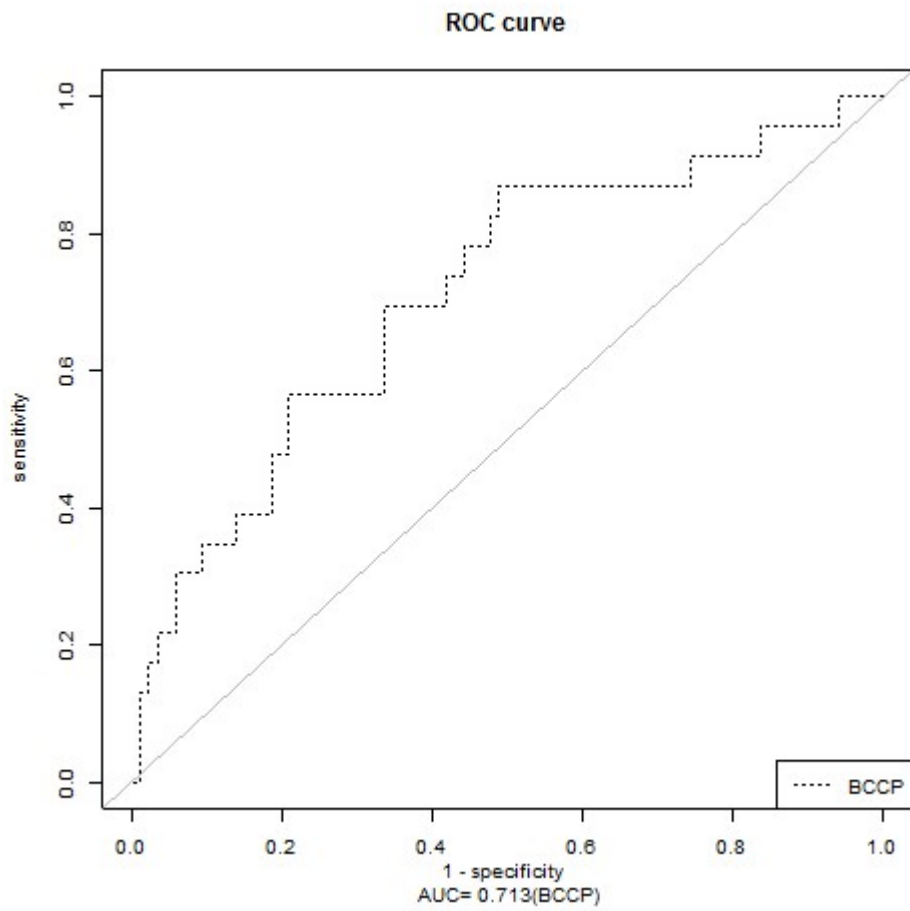

Supplementary Fig 4

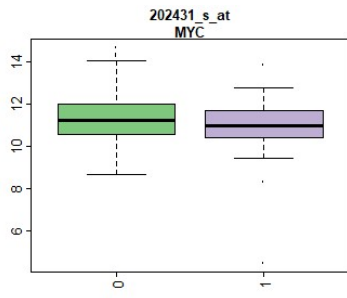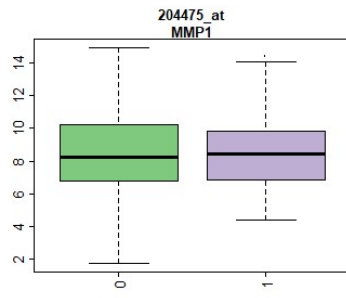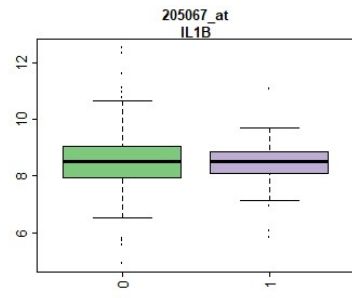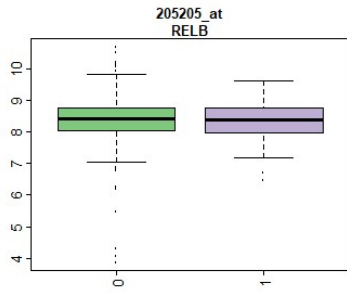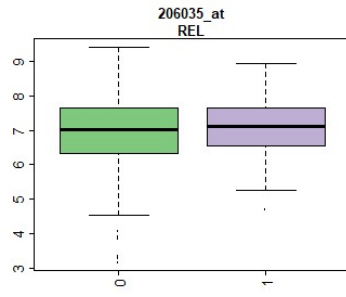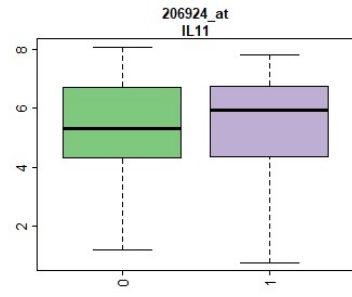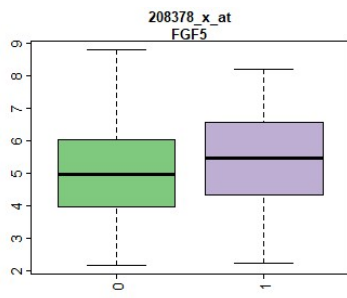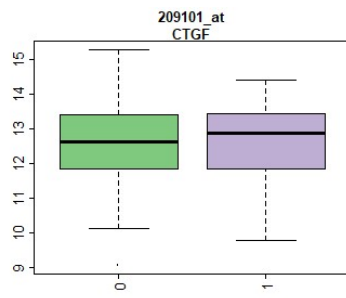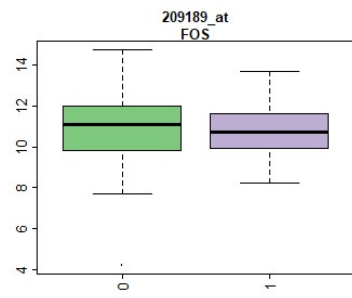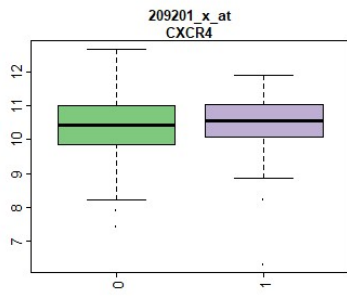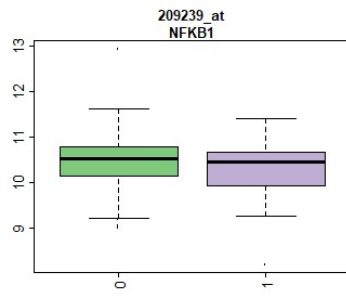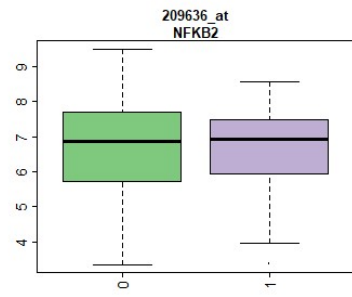

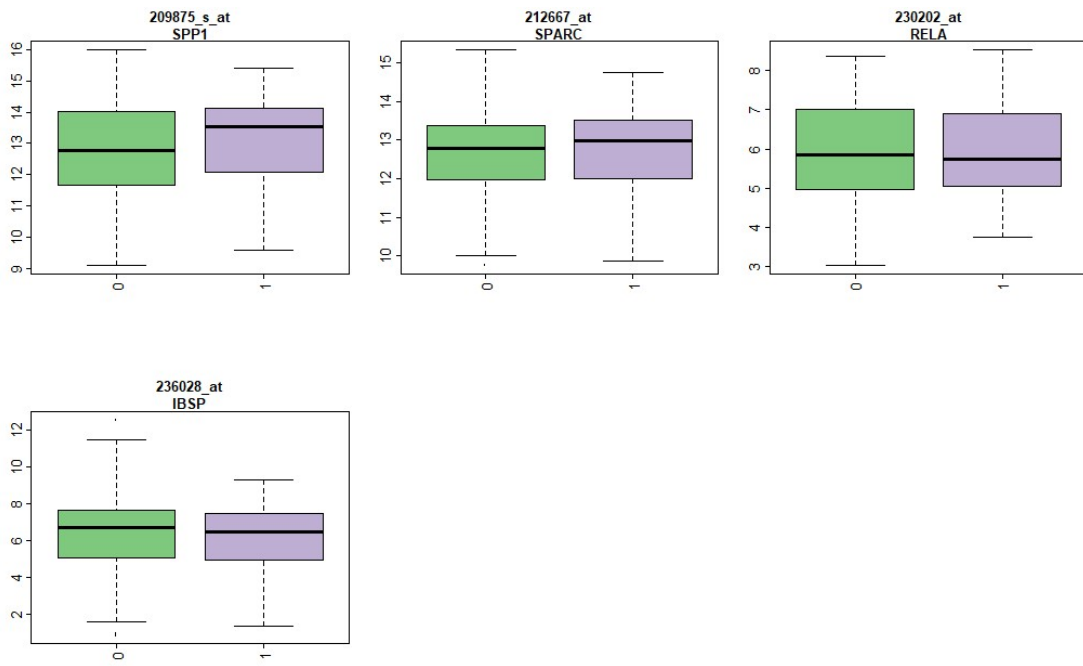

Supplementary Fig 5



Supplementary Table 1. Candidates of microcalcification-relevant genes from literature reviews.

| Probe set   | Description                                                                     | Symbol     |
|-------------|---------------------------------------------------------------------------------|------------|
| 202431_s_at | v-myc avian myelocytomatosis viral oncogene homolog                             | MYC [1]    |
| 205067_at   | interleukin 1, beta                                                             | IL1B [2]   |
| 205205_at   | v-rel avian reticuloendotheliosis viral oncogene homolog B                      | RELB [1]   |
| 206036_s_at | v-rel avian reticuloendotheliosis viral oncogene homolog                        | REL [1]    |
| 207535_s_at | nuclear factor of kappa light polypeptide gene enhancer in B-cells 2 (p49/p100) | NFKB2 [1]  |
| 209189_at   | FBJ murine osteosarcoma viral oncogene homolog                                  | FOS [1]    |
| 209239_at   | nuclear factor of kappa light polypeptide gene enhancer in B-cells 1            | NFKB1 [1]  |
| 209875_s_at | secreted phosphoprotein 1                                                       | SPP1 [3,4] |
| 209878_s_at | v-rel avian reticuloendotheliosis viral oncogene homolog A                      | RELA [1]   |
| 212667_at   | secreted protein, acidic, cysteine-rich (osteonectin)                           | SPARC [4]  |
| 236028_at   | integrin-binding sialoprotein                                                   | IBSP [4-7] |
| 208378_x_at | fibroblast growth factor 5                                                      | FGF5 [8]   |
| 209101_at   | connective tissue growth factor                                                 | CTGF [8]   |
| 209201_x_at | chemokine (C-X-C motif) receptor 4                                              | CXCR4 [8]  |
| 206924_at   | interleukin 11                                                                  | IL11 [8]   |
| 204475_at   | matrix metalloproteinase 1                                                      | MMP1 [2,9] |

References to Supplementary Table 1

1. McCarthy GM, Augustine JA, Baldwin AS, Christopherson PA, Cheung HS, Westfall PR, Scheinman RI (1998) Molecular mechanism of basic calcium phosphate crystal-induced activation of human fibroblasts. Role of nuclear factor kappaB, activator protein 1, and protein kinase c. *J Biol Chem.* 273:35161-9.
2. Rutter JL, Benbow U, Coon CI, Brinckerhoff CE (1997) Cell-type specific regulation of human interstitial collagenase-1 gene expression by interleukin-1 beta (IL-1 beta) in human fibroblasts and BC-8701 breast cancer cells. *J Cell Biochem* 66:322-36.
3. Scimeca M, Giannini E, Antonacci C, Pistolesse CA, Spagnoli LG, Bonanno E (2014) Microcalcifications in breast cancer: an active phenomenon mediated by epithelial cells with mesenchymal characteristics. *BMC Cancer* 14:286.
4. Bellahcène A, Bachelier R, Detry C, Lidereau R, Cluzardin P, Castronovo V (2007) Transcriptome analysis reveals an osteoblast-like phenotype for human osteotropic breast cancer cells. *Breast Cancer Res Treat* 101:135-48.
5. Bellahcène A, Merville MP, Castronovo V (1994) Expression of bone sialoprotein, a bone matrix protein, in human breast cancer. *Cancer Res* 54:2823-6.
6. Bellahcène A, Castronovo V (1995) Increased expression of osteonectin and osteopontin, two bone matrix proteins, in human breast cancer. *Am J Pathol* 146:95-100. Bellahcène A, Kroll M, Liebans

- F, Castronovo V (1996) Bone sialoprotein expression in primary human breast cancer is associated with bone metastases development. *J Bone Miner Res* 11:665-70.
7. Bellahcène A, Kroll M, Liebens F, Castronovo V (1996) Bone sialoprotein expression in primary human breast cancer is associated with bone metastases development. *J Bone Miner Res* 11:665-70.
  8. Kang Y, Siegel PM, Shu W, Drobnjak M, Kakonen SM, Cord'n-Cardo C, Guise TA, Massaguè J (2003) A multigenic program mediating breast cancer metastasis to bone. *Cancer Cell* 3:537-49.
  9. Morgan MP, Cooke MM, Christopherson PA, Westfall PR, McCarthy GM (2001) Calcium hydroxyapatite promotes mitogenesis and matrix metalloproteinase expression in human breast cancer cell lines. *Mol Carcinog* 32:111-7.

Supplementary Table 2. Intersect of differentially expressed genes pertaining microcalcification and DCIS.

| <b>Probe set</b> | <b>Description</b>                                                         | <b>Symbol</b> |
|------------------|----------------------------------------------------------------------------|---------------|
| 1552845_at       | claudin 15                                                                 | CLDN15        |
| 1559050_at       | HLA complex group 27 (non-protein coding)                                  | HCG27         |
| 1560112_at       | WD repeat and FYVE domain containing 2                                     | WDFY2         |
| 1569315_s_at     | long intergenic non-protein coding RNA 894                                 | LINC00894     |
| 1569320_at       | GC-rich promoter binding protein 1-like 1                                  | GPBP1L1       |
| 1569484_s_at     | MDN1, midasin homolog (yeast)                                              | MDN1          |
| 207287_at        | BIN3 intronic transcript 1 (non-protein coding)                            | BIN3-IT1      |
| 207987_s_at      | gonadotropin-releasing hormone 1 (luteinizing-releasing hormone)           | GNRH1         |
| 215203_at        | golgin A4                                                                  | GOLGA4        |
| 217671_at        | Down syndrome encephalopathy related protein 1                             | DSERG1        |
| 218246_at        | mitochondrial E3 ubiquitin protein ligase 1                                | MUL1          |
| 232804_at        | uncharacterized LOC100506385                                               | AP000330.8    |
| 236320_at        | coiled-coil domain containing 17                                           | CCDC17        |
| 237783_at        | PLAC8-like 1                                                               | PLAC8L1       |
| 238412_at        | RNA polymerase I transcription factor homolog (S. cerevisiae) pseudogene 3 | RRN3P3        |
| 239556_at        | uncharacterized LOC645513                                                  | LOC645513     |
| 240868_at        | uncharacterized LOC100129406                                               | LOC100129406  |
| 244840_x_at      | dedicator of cytokinesis 4                                                 | DOCK4         |

Supplementary Table 3. Predicted risk groups and clinical data for survival analysis of 109 Taiwanese breast cancers

| Microarray<br>experiment<br>names | DCIS | Comed-DCIS | Microcalcification | Survival time(year) | Relapse status | ER | PR | Grade | HER2 IHC(ISH) | HER2 status | Predicted risk group |
|-----------------------------------|------|------------|--------------------|---------------------|----------------|----|----|-------|---------------|-------------|----------------------|
| 7 cancer.CEL                      | 0    |            | 0                  | 5.58                | 0              | 80 | 10 | 3     | 2             | 0           | low                  |
| 8 cancer.CEL                      | 1    | 1          | 1                  | 1.58                | 1              | 0  | 0  | 3     | 3             | 1           | low                  |
| 9 cancer.CEL                      | 0    |            | 0                  | 5.75                | 0              | 85 | 50 | 2     | 1             | 0           | low                  |
| 10 cancer.CEL                     | 1    | 0          | 1                  | 5.50                | 0              | 80 | 50 | 1     | 1             | 0           | high                 |
| 12 cancer.CEL                     | 1    | 0          | 1                  | 5.67                | 0              | 90 | 0  | 1     | 2             | 0           | low                  |
| 13 cancer.CEL                     | 1    | 1          | 1                  | 2.08                | 1              | 0  | 0  | 3     | 2             | 0           | high                 |
| 14 cancer.CEL                     | 1    | 1          | 1                  | 5.58                | 0              | 0  | 0  | 2     | 3             | 1           | low                  |
| 15 cancer.CEL                     | 1    | 1          | 1                  | 5.50                | 0              | 70 | 20 | 3     | 3             | 1           | low                  |
| 22 cancer.CEL                     | 1    | 0          | 0                  | 5.58                | 0              | 0  | 0  | 3     | 1             | 0           | high                 |
| 23 cancer.CEL                     | 0    |            | 0                  | 5.67                | 0              | 80 | 90 | 2     | 2             | 0           | low                  |
| 28 cancer.CEL                     | 1    | 0          | 1                  | 5.67                | 0              | 70 | 30 | 2     | 2             | 0           | high                 |
| 45 cancer.CEL                     | 1    | 0          | 1                  | 5.00                | 1              | 0  | 0  | 2     | 1             | 0           | high                 |
| 48 cancer.CEL                     | 1    | 1          | 1                  | 4.00                | 0              | 0  | 0  | 3     | 3             | 1           | high                 |
| 58 cancer.CEL                     | 1    | 1          | 1                  | 4.75                | 0              | 70 | 15 | 3     | 3             | 1           | low                  |
| 59 cancer.CEL                     | 1    | 1          | 1                  | 3.42                | 1              | 50 | 40 | 3     | 1             | 0           | high                 |
| 62 cancer.CEL                     | 0    |            | 0                  | 1.33                | 1              | 0  | 0  | 3     | 3             | 1           | low                  |
| 64 cancer.CEL                     | 0    |            | 0                  | 1.75                | 1              | 0  | 0  | 3     | 2             | 0           | high                 |
| 65 cancer.CEL                     | 1    | 1          | 1                  | 5.00                | 0              | 80 | 0  | 3     | 3             | 1           | low                  |

|                |   |   |   |      |   |    |    |   |   |   |      |
|----------------|---|---|---|------|---|----|----|---|---|---|------|
| 66 cancer.CEL  | 1 | 1 | 1 | 4.92 | 0 | 90 | 50 | 2 | 3 | 1 | low  |
| 69 cancer.CEL  | 0 |   | 0 | 4.92 | 0 | 0  | 0  | 3 | 1 | 0 | high |
| 70 cancer.CEL  | 1 | 0 | 1 | 4.92 | 0 | 95 | 95 | 2 | 2 | 0 | low  |
| 72 cancer.CEL  | 1 | 1 | 0 | 5.00 | 0 | 0  | 0  | 3 | 3 | 1 | high |
| 75 cancer.CEL  | 1 | 1 | 1 | 4.67 | 0 | 0  | 0  | 3 | 3 | 1 | high |
| 76 cancer.CEL  | 0 |   | 1 | 4.75 | 0 | 80 | 60 | 2 | 1 | 0 | low  |
| 78 cancer2.CEL | 1 | 1 | 1 | 4.83 | 0 | 0  | 0  | 3 | 1 | 0 | high |
| 90T.CEL        | 1 | 1 | 1 | 4.50 | 0 | 10 | 10 | 3 | 1 | 0 | high |
| 111T.CEL       | 1 | 1 | 1 | 4.17 | 0 | 95 | 15 | 2 | 1 | 0 | high |
| 112T.CEL       | 1 | 0 | 1 | 4.08 | 0 | 95 | 95 | 1 | 2 | 0 | high |
| 120T.CEL       | 1 | 1 | 1 | 0.08 | 1 | 0  | 0  | 3 | 2 | 0 | high |
| 128T.CEL       | 1 | 0 | 1 | 3.67 | 0 | 95 | 95 | 3 | 3 | 1 | low  |
| 129T.CEL       | 1 | 0 | 1 | 3.67 | 0 | 95 | 60 | 2 | 3 | 1 | low  |
| 133T.CEL       | 1 | 1 | 1 | 3.58 | 0 | 0  | 0  | 3 | 3 | 1 | low  |
| 134T.CEL       | 1 | 1 | 1 | 3.08 | 0 | 0  | 0  | 3 | 3 | 1 | high |
| 135T.CEL       | 1 | 0 | 1 | 2.08 | 1 | 70 | 10 | 3 | 1 | 0 | high |
| 136T.CEL       | 1 | 0 | 1 | 3.17 | 0 | 95 | 95 | 2 | 1 | 0 | high |
| 140T.CEL       | 1 | 1 | 1 | 2.17 | 0 | 0  | 0  | 2 | 3 | 1 | high |
| 142T.CEL       | 1 | 1 | 1 | 1.25 | 0 | 0  | 0  | 3 | 3 | 1 | low  |
| 151T.CEL       | 1 | 1 | 1 | 4.17 | 0 | 60 | 30 | 2 | 3 | 1 | low  |
| 153T.CEL       | 1 | 1 | 1 | 1.75 | 0 | 0  | 0  | 2 | 3 | 1 | high |
| 154T.CEL       | 1 | 1 | 1 | 2.67 | 0 | 80 | 90 | 2 | 3 | 1 | low  |
| BH0312-3.CEL   | 1 | 0 | 0 | 4.58 | 0 | 95 | 60 | 2 | 3 | 1 | low  |

|               |   |   |   |      |   |    |    |   |         |   |      |
|---------------|---|---|---|------|---|----|----|---|---------|---|------|
| BH0312-4.CEL  | 1 | 0 | 1 | 4.58 | 0 | 20 | 10 | 2 | 2       | 0 | high |
| BH0312-6.CEL  | 0 |   | 0 | 4.58 | 0 | 0  | 0  | 3 | 3       | 1 | low  |
| BH0312-7.CEL  | 1 | 1 | 1 | 1.17 | 1 | 0  | 0  | 3 | 3       | 1 | low  |
| BH0312-8.CEL  | 1 | 1 | 1 | 4.25 | 0 | 75 | 75 | 3 | 1       | 0 | high |
| BH0312-9.CEL  | 1 | 0 | 0 | 4.25 | 0 | 90 | 90 | 3 | 1       | 0 | high |
| BH0312-10.CEL | 1 | 0 | 1 | 4.17 | 0 | 80 | 80 | 2 | 2       | 0 | high |
| BH0312-11.CEL | 1 | 1 | 1 | 4.08 | 0 | 95 | 95 | 3 | 2       | 0 | high |
| BH0312-12.CEL | 1 | 0 | 1 | 3.83 | 0 | 40 | 10 | 3 | 3       | 1 | low  |
| BH0312-13.CEL | 1 | 1 | 1 | 1.08 | 1 | 0  | 0  | 3 | 2       | 0 | high |
| BH0344-2.CEL  | 0 |   | 0 | 4.50 | 0 | 95 | 40 | 2 | 1       | 0 | high |
| BH0344-3.CEL  | 1 | 0 | 1 | 4.50 | 0 | 95 | 30 | 2 | 3       | 1 | low  |
| BH0344-4.CEL  | 1 | 0 | 1 | 3.42 | 1 | 15 | 0  | 2 | 2       | 0 | high |
| BH0344-7.CEL  | 1 | 0 | 1 | 3.83 | 0 | 95 | 70 | 2 | 3       | 1 | low  |
| BH0344-9.CEL  | 1 | 0 | 1 | 2.83 | 0 | 95 | 95 | 2 | 2(1.02) | 0 | high |
| BH0344-10.CEL | 1 | 0 | 1 | 2.58 | 0 | 95 | 0  | 2 | 2(0.82) | 0 | high |
| BH0354-1.CEL  | 1 | 0 | 1 | 4.58 | 0 | 90 | 0  | 3 | 2       | 0 | low  |
| BH0354-2.CEL  | 0 |   | 1 | 4.17 | 0 | 0  | 0  | 2 | 3       | 1 | low  |
| BH0354-3.CEL  | 1 | 1 | 1 | 2.17 | 1 | 95 | 15 | 3 | 1       | 0 | high |
| BH0354-4.CEL  | 1 | 0 | 0 | 2.92 | 0 | 10 | 0  | 3 | 2(1.14) | 0 | high |
| BH0394-1.CEL  | 1 | 1 | 1 | 4.67 | 0 | 90 | 50 | 2 | 2       | 0 | low  |
| BH0394-2.CEL  | 1 | 1 | 1 | 4.17 | 0 | 0  | 0  | 2 | 3       | 1 | low  |
| BH0394-3.CEL  | 1 | 0 | 0 | 4.50 | 0 | 95 | 25 | 1 | 2       | 0 | low  |
| BH0394-4.CEL  | 1 | 0 | 1 | 4.50 | 0 | 95 | 10 | 2 | 1       | 0 | low  |

|               |   |   |   |      |   |    |    |   |         |   |      |
|---------------|---|---|---|------|---|----|----|---|---------|---|------|
| BH0394-5.CEL  | 1 | 1 | 1 | 4.42 | 0 | 95 | 30 | 2 | 2       | 0 | low  |
| BH0394-6.CEL  | 1 | 0 | 1 | 4.33 | 0 | 95 | 10 | 3 | 2       | 0 | low  |
| BH0394-7.CEL  | 0 |   | 1 | 4.25 | 0 | 95 | 5  | 3 | 3       | 1 | low  |
| BH0394-8.CEL  | 1 | 0 | 0 | 3.00 | 0 | 95 | 30 | 2 | 2(1.1)  | 0 | high |
| BH0394-9.CEL  | 1 | 0 | 1 | 2.92 | 0 | 90 | 40 | 1 | 1       | 0 | low  |
| BH0394-10.CEL | 1 | 0 | 1 | 0.50 | 0 | 0  | 0  | 2 | 3       | 1 | low  |
| BH0396-1.CEL  | 1 | 0 | 0 | 4.67 | 0 | 50 | 60 | 2 | 0       | 0 | high |
| BH0396-2.CEL  | 1 | 1 | 1 | 4.08 | 0 | 60 | 5  | 3 | 3       | 1 | low  |
| BH0396-3.CEL  | 1 | 0 | 1 | 4.25 | 0 | 95 | 50 | 2 | 2       | 0 | low  |
| BH0396-4.CEL  | 1 | 1 | 1 | 0.08 | 0 | 95 | 1  | 3 | 3       | 1 | low  |
| BH0396-5.CEL  | 1 | 1 | 1 | 3.25 | 0 | 80 | 5  | 3 | 2       | 0 | high |
| BH0396-6.CEL  | 0 |   | 1 | 4.33 | 0 | 80 | 60 | 2 | 1       | 0 | high |
| BH0396-7.CEL  | 1 | 0 | 1 | 2.42 | 0 | 95 | 30 | 2 | 0       | 0 | high |
| BH0396-10.CEL | 1 | 1 | 1 | 2.50 | 0 | 70 | 30 | 2 | 3       | 1 | low  |
| BH0430-2.CEL  | 1 | 1 | 1 | 0.50 | 0 | 0  | 0  | 3 | 3       | 1 | low  |
| BH0434-1.CEL  | 1 | 0 | 1 | 0.00 | 1 | 90 | 20 | 2 | 2(1.76) | 0 | low  |
| BH0470-1.CEL  | 1 | 0 | 0 | 1.75 | 0 | 90 | 50 | 2 | 1       | 0 | high |
| BH0470-2.CEL  | 1 | 1 | 1 | 1.75 | 0 | 0  | 0  | 3 | 3       | 1 | high |
| BH0470-3.CEL  | 1 | 0 | 1 | 1.75 | 0 | 9  | 9  | 3 | 1       | 0 | high |
| BH0470-5.CEL  | 1 | 0 | 1 | 1.50 | 0 | 90 | 30 | 2 | 3       | 1 | low  |
| BH0470-6.CEL  | 1 | 1 | 1 | 1.42 | 0 | 70 | 70 | 3 | 1       | 0 | low  |
| BH0478-3.CEL  | 1 | 0 | 1 | 1.50 | 0 | 90 | 90 | 2 | 1       | 0 | low  |
| BH0478-4.CEL  | 1 | 0 | 1 | 1.50 | 0 | 90 | 30 | 2 | 1       | 0 | low  |

|                           |   |   |   |      |   |    |    |   |         |   |      |
|---------------------------|---|---|---|------|---|----|----|---|---------|---|------|
| BH0478-5.CEL              | 1 | 0 | 1 | 1.25 | 0 | 90 | 90 | 2 | 2(1.06) | 0 | high |
| BH0478-6.CEL              | 1 | 1 | 1 | 1.17 | 0 | 0  | 0  | 3 | 1       | 0 | high |
| BH0485-3.CEL              | 1 | 0 | 1 | 1.50 | 0 | 90 | 0  | 2 | 2(3.32) | 1 | low  |
| BH0485-4.CEL              | 1 | 1 | 1 | 1.42 | 0 | 0  | 0  | 3 | 3       | 1 | high |
| BH0485-5.CEL              | 1 | 0 | 1 | 1.42 | 0 | 90 | 10 | 2 | 1       | 0 | low  |
| BH0485-6.CEL              | 1 | 1 | 1 | 1.42 | 0 | 1  | 0  | 3 | 3       | 1 | high |
| BH0485-7.CEL              | 1 | 0 | 0 | 1.42 | 0 | 90 | 3  | 1 | 1       | 0 | low  |
| BH0485-8.CEL              | 1 | 0 | 1 | 0.00 | 1 | 95 | 98 | 3 | 1       | 0 | low  |
| BH0485-9.CEL              | 1 | 1 | 1 | 1.25 | 0 | 0  | 0  | 3 | 3       | 1 | high |
| BH0485-10.CEL             | 1 | 0 | 0 | 1.33 | 0 | 1  | 0  | 2 | 3       | 1 | high |
| BH0505-3.CEL              | 1 | 0 | 1 | 1.00 | 0 | 95 | 60 | 2 | 1       | 0 | low  |
| BH0505-5.CEL              | 0 |   | 0 | 1.00 | 0 | 0  | 0  | 3 | 2(1.95) | 0 | high |
| BH0505-8.CEL              | 1 | 1 | 0 | 0.00 | 0 | 0  | 0  | 3 | 3       | 1 | low  |
| BH0505-9.CEL              | 1 | 1 | 1 | 1.67 | 0 | 20 | 0  | 3 | 1       | 0 | low  |
| BH0533-1.CEL              | 1 | 1 | 1 | 0.75 | 0 | 98 | 0  | 3 | 1       | 0 | low  |
| BH0533-2.CEL              | 1 | 0 | 0 | 1.58 | 0 | 90 | 60 | 2 | 2(2.21) | 1 | low  |
| BH0533-3.CEL              | 0 |   | 1 | 1.50 | 0 | 1  | 0  | 2 | 3       | 1 | high |
| BH0533-4.CEL              | 0 |   | 0 | 1.58 | 0 | 90 | 5  | 2 | 1       | 0 | high |
| BH0533-5.CEL              | 1 | 1 | 1 | 0.83 | 0 | 60 | 5  | 3 | 3       | 1 | low  |
| Breast Cancer<br>108T.CEL | 1 | 1 | 1 | 4.33 | 0 | 0  | 0  | 2 | 3       | 1 | high |
| Breast Cancer<br>119T.CEL | 1 | 0 | 1 | 4.25 | 0 | 95 | 40 | 2 | 2       | 0 | high |





**Gene symbol list (from top to bottom) for Y-axis of Fig 3**

Symbol

EHD3

SLC22A17

IGFBP2

C19orf25

STK16

ZDHHC16

HPS6

ZBTB9

NOP9

MUL1

HTRA2

GLTPD1

SCAMP2

FDFT1

RAI1

DNAL4

YWHAQ

TOR1B

FAM213B

KRT71

TMEM203

ATRN

DCP1B

ALG2

ENOPH1

KIAA1279

SLC25A38

CINP

TMEM25

DNAJC16

OGFOD3

TMEM242

S100A14

PRDX2

SLC17A6

TLR8-AS1

TKTL1  
IL1RAP  
CPA4  
NFE4  
AGO3  
DUSP22  
CCDC17  
CTRL  
LOC284009  
PSORS1C3  
AP000330.8  
GAS6-AS1  
PLAC8L1  
GUCY1B2  
PPIEL  
RP1-17K7.2  
RP3-365O12.2  
LINC00113  
DKFZp667F0711  
PRR26  
CNTNAP3  
LINC00639  
LINC00973  
LINC00485  
LGSN  
FLJ37786  
ALX1  
ZNF876P  
NECAB2  
KRT85  
GK5  
LINC00328  
OR10D3  
RNF213  
FAHD2CP  
CYP1A2  
HIST1H1T  
KCNK9

EMR3  
GPR97  
LINC00302  
IL20RB  
SERPINB7  
SLCO4A1  
NWD2  
ANGPTL4  
PKD1L2  
EIF1  
LSMEM1  
PPFIA4  
MAGEA4  
CACNA1B  
LOC101060391  
RHBDL1  
RRN3P2  
HCG27  
XRCC2  
WDFY2  
GPBP1L1  
MARK3  
GRB10  
MYL6  
GNRH1  
BIN3-IT1  
LINC00893  
LINC00894  
NOMO3  
MDN1  
ARHGEF10  
RRN3P3  
MKNK1  
KIAA0754  
NRD1  
UGP2  
FAM185A  
PRO2852

GOLGA4  
CFLAR  
DSERG1  
LOC100129406  
TMEM43  
KATNBL1  
LOC100507311  
LOC100131541  
PCSK7  
TMEM63A  
ECHDC2  
EIF3B  
SSBP1  
ARF1  
CLDN15  
LINC00152  
RALGAPA2  
FAM13A-AS1  
DOCK4  
PRKAA1  
LOC645513  
LINC01125  
UQCRC2  
LOC100507281  
CREB5  
ASAP1-IT1  
FLJ21369  
MAEL  
NQO2  
SCML1  
SCML2
